# Supplementary material
Source: PubMed Central journal article supplement (PMC4482303)
Supplement: DS_10.1177_1941738115572984.pdf [file DS_10.1177_1941738115572984.pdf]

## APPENDIX 1: SURVEY

### Clinician Patterns of Ankle Brace Recommendation and Perception of Factors Associated with Brace Use

#### A. Patient and Brace Volume:

1. In the last 12 months, please estimate the number of patients with ankle sprain injuries you have evaluated and/or treated:  0  1-5  6-10  11-15  16-25  
 26-50  51 or more

**If you answered 0 to the above question, please skip forward to section F on page 5**

#### Ankle brace recommendations:

2a. In the last 12 months, please estimate the total number of ankle braces you have dispensed and/or recommended to your patients:  0  1-5  6-10  11-15  
 16-25  26-50  51 or more

**If you answered 0 to the above question, please skip forward to section D on page 4**

2b. In the last 12 months, please estimate the percentage of patients you have treated for an **initial** ankle sprain injury for whom you recommend use of an ankle brace: \_\_\_\_\_ %

2c. In the last 12 months, please estimate the percentage of patients you have treated for a **recurrent** ankle sprain injury for whom you recommend use of an ankle brace: \_\_\_\_\_ %

3a. In your current position do you have the autonomy to decide if a patient needs to use an ankle brace?  
 yes  no

3b. If you answered yes to question 3a, do you also have the autonomy to decide which ankle brace a patient should wear?  
 yes  no

**B. Most Frequently recommended braces**

**1. Please select the brace you have recommended and/or dispensed most frequently in the last 12 months:**

---

(drop down menu on web survey listing the following options:)

- Active Ankle Support (Active Ankle)
- Aircast Air-Stirrup (Aircast)
- Ankle Brace Lock (Breg, Vista, CA)
- Ankle Ligament Protector (DonJoy)
- Ankle Lok (the original "Swede-O")
- ASO (Medical Specialties Charlotte, NC)
- Guardian Ankle (McDavid Sports)
- McDavid Sports Medical Products lace-up brace
- RocketSoc (DonJoy)Universal Ankle Stirrup (DonJoy)
- Other (please specify)

**In the last 12 months, please estimate how many times you have recommended and/or dispensed the above brace:**

- 1-5    6-10    11-15    16-25    26-50    51 or more

**2. Please select the brace you have recommended and/or dispensed 2nd most frequently in the last 12 months:**

(drop down menu of braces)

- Active Ankle Support (Active Ankle)
  - Aircast Air-Stirrup (Aircast)
  - Ankle Brace Lock (Breg, Vista, CA)
  - Ankle Ligament Protector (DonJoy)
  - Ankle Lok (the original "Swede-O")
  - ASO (Medical Specialties Charlotte, NC)
  - Guardian Ankle (McDavid Sports)
  - McDavid Sports Medical Products lace-up brace
  - RocketSoc (DonJoy)Universal Ankle Stirrup (DonJoy)
  - Other (please specify) \_\_\_\_\_
- N/A no more than one brace recommended

**In the last 12 months, please estimate how many times you have recommended and/or dispensed the above brace:**

- 1-5    6-10    11-15    16-25    26-50    51 or more

**3. Please select the brace you have recommended and/or dispensed 3rd most frequently in the last 12 months:**

(drop down menu of braces)

Active Ankle Support (Active Ankle)

Aircast Air-Stirrup (Aircast)

Ankle Brace Lock (Breg, Vista, CA)

Ankle Ligament Protector (DonJoy)

Ankle Lok (the original "Swede-O")

ASO (Medical Specialties Charlotte, NC)

Guardian Ankle (McDavid Sports)

McDavid Sports Medical Products lace-up brace

RocketSoc (DonJoy) Universal Ankle Stirrup (DonJoy)

Other (please specify) \_\_\_\_\_

N/A no more than two braces recommended

**In the last 12 months, please estimate how many times you have recommended and/or dispensed the above brace:**

1-5    6-10    11-15    16-25    26-50    51 or more

**C. Most influential factors when selecting a brace**

1. Please select the factor that is most influential when you select an ankle brace.

- availability of the brace
- comfort of the brace
- cost of the brace
- effectiveness in preventing ankle sprain
- likelihood of compliance
- influence on performance
- severity (grade) of ankle sprain
- other (please describe \_\_\_\_\_)

2. Please select the factor that is 2nd most influential when you select an ankle brace.

- availability of the brace
- comfort of the brace
- cost of the brace
- effectiveness in preventing ankle sprain
- likelihood of compliance
- influence on performance
- severity (grade) of ankle sprain
- other (please describe \_\_\_\_\_)
- N/A only one factor influences my decision

3. Please select the factor that is 3rd most influential when you select an ankle brace.

- \_\_\_ availability of the brace
- \_\_\_ comfort of the brace
- \_\_\_ cost of the brace
- \_\_\_ effectiveness in preventing ankle sprain
- \_\_\_ likelihood of compliance
- \_\_\_ influence on performance
- \_\_\_ severity (grade) of ankle sprain
- \_\_\_ other (please describe \_\_\_\_\_)
- \_\_\_ N/A no more than two factors influence my decision

#### **D. Potential Ankle Brace Side-Effects**

**Please check the box of the appropriate answer for each of the following questions:**

1. When considering recommendation of an ankle brace, how concerned are you about the potential for **reduced ankle musculature strength** once the brace is no longer used?

- 1. not concerned at all
- 2. minimally concerned
- 3. moderately concerned
- 4. greatly concerned

2. When considering recommendation of an ankle brace, how concerned are you about the potential for **compromised ankle joint proprioception** once the brace is no longer used?

- 1. not concerned at all
- 2. minimally concerned
- 3. moderately concerned
- 4. greatly concerned

3. When considering recommendation of an ankle brace, how concerned are you about the potential for **compromised dynamic balance** once the brace is no longer used?

- 1. not concerned at all
- 2. minimally concerned
- 3. moderately concerned
- 4. greatly concerned

4. When considering recommendation of an ankle brace, how concerned are you about increased **risk of injury to knee joint structures**?

- 1. not concerned at all
- 2. minimally concerned
- 3. moderately concerned
- 4. greatly concerned

### **E. Current Practice**

1. On average for how long after a **first-time ankle sprain** do you typically recommend a patient wear an ankle brace during physical activity that poses a risk of ankle sprain injury?

- Not at all
- 1-6 days
- 1-4 weeks
- 1-3 months
- greater than 3 months
- forever when participating in the activity

2. On average for how long after a **recurrent ankle sprain** do you typically recommend a patient wear an ankle brace during physical activity that poses a risk of ankle sprain injury?

- Not at all
- 1-6 days
- 1-4 weeks
- 1-3 months
- greater than 3 months
- forever when participating in the activity

### **F. Please provide the following information about your experience as a clinician:**

1. Please indicate your professional status:  ATC       PT       PT and ATC

2. Please record your total years of clinical experience as an      ATC \_\_\_\_\_      PT \_\_\_\_\_

3. Please indicate your years of experience in orthopedics and/or sports medicine:

\_\_\_\_\_

4. What is your current clinical Setting (please check all that apply):

- Sports Team(s)
- Sports Medicine clinic
- Outpatient Orthopedic clinic
- Other (please describe): \_\_\_\_\_

## Appendix 2. Descriptive Statistics\*

---

|                                                                                                | <u>N (%)</u> |
|------------------------------------------------------------------------------------------------|--------------|
| <b>Clinicians' Professional Status</b>                                                         |              |
| AT                                                                                             | 198 (61.1)   |
| PT                                                                                             | 99 (30.6)    |
| Both AT and PT                                                                                 | 27 (8.3)     |
| Total                                                                                          | 324 (100.0)  |
| <b>Clinicians' Clinical Setting<sup>†</sup></b>                                                |              |
| Sports team                                                                                    | 108 (33.3)   |
| Sports medicine                                                                                | 63 (19.4)    |
| Outpatient orthopaedic                                                                         | 150 (46.3)   |
| University                                                                                     | 21 (6.5)     |
| High school/middle school                                                                      | 35 (10.8)    |
| Other                                                                                          | 23 (7.1)     |
| <b>Clinicians' Years of Experience, mean (SD)</b>                                              |              |
| AT                                                                                             | 11.0 (8.1)   |
| PT                                                                                             | 12.8 (9.7)   |
| Orthopaedics and/or sports medicine                                                            | 11.4 (8.0)   |
| <b>Percentage of patients for whom clinicians recommended use of an ankle brace, mean (SD)</b> |              |
| Initial sprain, all clinicians                                                                 | 48.1 (32.0)  |
| Recurrent sprain, all clinicians                                                               | 64.1 (35.5)  |

---

\*Data presented as N (%) unless otherwise indicated. AT, athletic trainer; PT, physical therapist.

<sup>†</sup>Since respondents were allowed to select more than 1 setting, percentages add to >100%
